# Supplementary material for: Heritability of the extra-pair mating behaviour of the pied flycatcher in Western Siberia
Source: PeerJ. 2020 Jul 31;8:e9571. doi: 10.7717/peerj.9571 (PMC7397985; doi:10.7717/peerj.9571)
Supplement: Supplemental Information 3 — The number of extra-pair offspring and the values of all fixed and random factors used in the calculations and the pruned (informative) pedigree. [file peerj-08-9571-s003.xlsx]

## Sheet: Data
No	Nestbox	Animal	Sex	EPO	sim.EPO	Age	Nest.Q.Nrec			Notes
1	1	xl94837	f	0	0	yearling	4			No	- raw number
2	2	xl94607	f	0	0	yearling	5			Nestbox	- number of nestbox
3	3	vd16304	f	0	1	older	0			Animal	- ring number of bird
4	4	xl28393	f	0	0	older	0			Sex	- sex of bird, m - male, f - female
5	5	xk41452	f	1	0	older	5			EPO	- extra-pair offspring number
6	6	xl28471	f	0	0	older	5			sim.EPO	- simulated EPO
7	7	vd16440	f	0	0	older	4			Age	- age of bird
8	8	xl93858	f	2	1	yearling	1			Nest.Q.Nrec	- nest quality: number of recruits
9	9	xl94606	f	0	0	yearling	3
10	11	xl94799	f	0	0	yearling	4
11	13	vd16151	f	0	0	older	3
12	14	xl94635	f	2	0	yearling	2
13	15	vt24185	f	0	0	older	0
14	16	xl94619	f	2	0	yearling	4
15	17	xl94746	f	3	0	yearling	1
16	19	xl94745	f	0	1	yearling	4
17	20	xl94470	f	0	0	yearling	3
18	21	xt96546	f	0	2	older	4
19	23	xl94621	f	0	0	yearling	2
20	25	vd16427	f	0	0	older	1
21	26	vd16103	f	4	0	older	4
22	27	xl94767	f	0	0	yearling	3
23	28	xl94618	f	0	0	yearling	0
24	29	xt96694	f	0	0	older	2
25	30	xl94605	f	0	0	yearling	5
26	31	xl94766	f	0	0	yearling	3
27	32	xl28772	f	0	0	older	9
28	33	xl94743	f	0	0	yearling	7
29	34	xl94790	f	2	0	yearling	4
30	35	xk41318	f	0	0	older	3
31	36	xl94625	f	0	0	yearling	5
32	37	xl94706	f	0	0	yearling	2
33	38	vt24170	f	0	0	older	1
34	39	xl94608	f	0	0	yearling	6
35	40	xl94768	f	0	0	yearling	1
36	41	vd16505	f	0	0	older	1
37	42	xl94775	f	0	0	yearling	4
38	43	vd16338	f	0	0	older	3
39	44	xl28497	f	0	1	older	3
40	45	xt96074	f	0	0	older	1
41	47	xl94789	f	0	0	yearling	1
42	48	xl94788	f	1	0	yearling	3
43	49	xl94791	f	0	0	yearling	1
44	50	vd16431	f	0	0	older	1
45	51	xl94777	f	0	0	yearling	4
46	52	vd16357	f	0	0	older	6
47	53	vd16430	f	1	0	older	4
48	55	xl28249	f	0	0	older	2
49	57	xl94776	f	0	0	yearling	1
50	58	xl94747	f	2	0	yearling	1
51	59	xl94769	f	0	0	yearling	4
52	60	xk41711	f	0	1	older	0
53	61	xl28927	f	1	0	older	1
54	62	xl93752	f	0	0	yearling	3
55	63	vd16377	f	0	0	older	4
56	65	xl94765	f	0	1	yearling	4
57	66	xk41527	f	0	0	older	4
58	67	xk40600	f	0	0	older	0
59	68	vd16041	f	0	0	older	4
60	69	xl94028	f	0	2	yearling	0
61	70	xk41757	f	0	0	older	5
62	71	vt26744	f	0	0	older	6
63	72	xl28173	f	0	0	older	9
64	73	vd16363	f	1	0	older	3
65	76	xl93582	f	0	0	yearling	3
66	77	vd16524	f	0	1	older	2
67	78	xl28324	f	0	0	older	0
68	79	vt26715	f	0	0	older	2
69	80	xt96672	f	0	0	older	3
70	82	xk41519	f	0	0	older	6
71	83	vd16061	f	0	0	older	2
72	84	xt96054	f	0	0	older	5
73	85	xl28463	f	2	0	older	0
74	86	xl94764	f	0	0	yearling	8
75	88	xl28189	f	0	1	older	6
76	90	xl94617	f	0	0	yearling	1
77	91	xk41644	f	1	1	older	3
78	92	xl94735	f	0	0	yearling	2
79	93	xl94721	f	0	0	yearling	3
80	94	vd16442	f	6	0	older	2
81	95	xl93631	f	0	0	yearling	1
82	97	xl28503	f	0	0	older	2
83	98	xk41900	f	0	3	older	5
84	99	xk41068	f	0	0	older	4
85	100	vt24152	f	1	0	older	9
86	101	xt96685	f	0	0	older	4
87	103	xl94742	f	0	2	yearling	2
88	104	xl94728	f	0	0	yearling	1
89	105	xl94057	f	0	0	yearling	1
90	106	xl93813	f	0	0	yearling	1
91	107	vd16504	f	0	0	older	2
92	108	xl94616	f	0	0	yearling	3
93	109	xl93805	f	0	0	older	2
94	110	vd16496	f	0	1	older	2
95	111	xl94284	f	0	1	yearling	2
96	112	xl28852	f	0	0	older	2
97	113	xl94213	f	0	1	yearling	0
98	114	xk41476	f	1	0	older	4
99	115	xk41529	f	0	0	older	4
100	116	xl94393	f	0	0	yearling	1
101	117	xl94615	f	0	0	yearling	5
102	118	vd16435	f	0	1	older	2
103	119	vd16526	f	0	0	older	3
104	120	vd16534	f	0	0	older	5
105	121	xl28815	f	2	0	older	1
106	122	xk41506	f	0	1	older	7
107	123	xl94762	f	0	1	yearling	4
108	124	xl94741	f	0	0	yearling	1
109	125	xl28709	f	0	0	older	0
110	126	xk41855	f	0	0	older	6
111	127	vd16185	f	0	0	older	1
112	128	xk41600	f	0	0	older	0
113	129	xl94760	f	0	0	yearling	3
114	130	vd16464	f	0	0	older	3
115	133	xl94761	f	2	1	yearling	6
116	134	xl94787	f	2	1	yearling	6
117	135	xl94718	f	0	0	yearling	4
118	136	xl94214	f	0	0	yearling	2
119	137	vd16456	f	0	0	older	1
120	138	xl94785	f	0	0	yearling	3
121	139	xl94671	f	2	0	yearling	3
122	140	xl94784	f	0	0	yearling	3
123	141	vt24155	f	0	0	older	3
124	142	xl94740	f	0	0	yearling	3
125	143	xl94719	f	0	0	yearling	5
126	144	xl94798	f	0	0	yearling	4
127	145	xl93734	f	0	0	yearling	10
128	148	xl94763	f	0	1	yearling	0
129	150	xk41462	f	0	0	older	4
130	151	xl94603	f	0	0	yearling	4
131	152	xl94720	f	0	0	yearling	5
132	153	xl94294	f	0	0	yearling	4
133	154	xk41526	f	3	0	older	8
134	156	xt96681	f	1	0	older	3
135	157	xl94384	f	1	0	yearling	4
136	158	xt96568	f	2	0	older	6
137	159	xk41514	f	0	0	older	1
138	160	xk40235	f	0	1	older	6
139	161	xt96587	f	0	0	older	6
140	162	vd16525	f	0	0	older	13
141	163	xl94602	f	0	0	yearling	3
142	164	xl94155	f	0	1	yearling	3
143	165	xl94815	f	4	0	yearling	4
144	166	vd16126	f	0	0	older	3
145	167	xl93719	f	0	0	yearling	3
146	168	vd16452	f	2	0	older	6
147	169	xl94739	f	1	1	yearling	2
148	171	xl94752	f	0	1	yearling	2
149	173	xk41515	f	0	1	older	6
150	174	xl94797	f	0	0	yearling	5
151	175	vt24206	f	0	1	older	1
152	176	xl94774	f	1	0	yearling	2
153	177	xl28631	f	0	0	older	3
154	178	xl93613	f	0	0	older	3
155	179	xl94624	f	1	0	yearling	3
156	180	xl94733	f	1	0	yearling	4
157	181	xk41681	f	5	0	older	3
158	182	xl93652	f	0	0	yearling	2
159	183	xk41505	f	0	0	older	3
160	184	vd16426	f	0	1	older	2
161	185	xt96569	f	2	0	older	2
162	186	xt96555	f	0	0	older	7
163	187	xk40757	f	0	1	older	4
164	188	xl28897	f	1	0	older	6
165	189	xk41448	f	5	0	older	0
166	190	xk41473	f	1	0	older	3
167	191	xt96589	f	1	0	older	7
168	192	xk40900	f	2	0	older	2
169	193	vd16500	f	0	0	older	11
170	194	vt24201	f	0	0	older	4
171	195	xl28967	f	0	0	older	4
172	196	xt96686	f	0	0	older	5
173	197	vd16475	f	0	0	older	3
174	198	xl94670	f	0	0	yearling	2
175	199	xl94783	f	5	0	yearling	5
176	200	xl94734	f	0	0	yearling	4
177	201	xk41443	f	0	0	older	2
178	203	xl94838	f	0	0	yearling	0
179	204	xl94634	f	0	0	yearling	1
180	207	xl94450	f	0	0	yearling	0
181	211	xl94736	f	0	2	yearling	0
182	214	xl94620	f	0	0	yearling	2
183	215	xl94511	f	2	0	older	1
184	216	xl94744	f	0	0	yearling	0
185	218	xl94520	f	1	0	yearling	1
186	220	xl93615	f	0	1	yearling	0
187	221	xl94626	f	0	0	yearling	0
188	223	vd16600	f	0	0	yearling	3
189	224	xl94082	f	1	0	yearling	1
190	229	xl94080	f	1	0	yearling	6
191	230	xl94604	f	0	0	yearling	0
192	231	vt24143	f	0	0	older	0
193	235	xl93684	f	4	0	yearling	1
194	238	xl94921	f	0	0	yearling	0
195	239	xl28102	f	0	0	older	2
196	241	vd16429	f	1	1	older	0
197	242	xl28650	f	0	1	older	0
198	248	xl94064	f	0	0	yearling	0
199	251	vd16441	f	4	0	older	0
200	257	xl94661	f	0	0	yearling	0
201	267	xl94023	f	0	0	yearling	2
202	269	xl94660	f	1	1	yearling	0
203	271	xl93554	f	0	0	older	2
204	272	xl94672	f	0	0	yearling	1
205	279	xl94263	f	0	0	yearling	0
206	281	xl93942	f	0	0	yearling	0
207	301	xk41725	f	0	0	older	1
208	302	vt24195	f	2	0	older	5
209	303	xl94781	f	0	0	yearling	2
210	304	xk41453	f	0	0	older	2
211	305	vd16632	f	1	0	older	6
212	306	xk40855	f	1	1	older	3
213	307	vd16414	f	0	0	yearling	6
214	309	xl94623	f	0	0	yearling	4
215	310	xl93747	f	0	0	older	1
216	311	xl28072	f	0	6	older	5
217	312	vd16473	f	0	1	older	0
218	313	xl94729	f	0	0	yearling	3
219	314	xl94738	f	0	0	yearling	7
220	315	vt26703	f	0	0	older	2
221	316	xl94732	f	0	0	yearling	0
222	318	xk41522	f	0	0	older	6
223	319	xl94782	f	0	0	yearling	3
224	320	xk41864	f	0	1	older	3
225	321	xl94727	f	0	1	yearling	3
226	322	xl94726	f	0	0	yearling	0
227	323	xl28294	f	0	0	older	1
228	324	xk41524	f	2	1	older	3
229	325	xl94725	f	0	0	yearling	4
230	326	xl94750	f	0	0	yearling	1
231	327	vd16343	f	0	0	older	5
232	328	xl94796	f	0	2	yearling	1
233	330	vd16528	f	0	1	older	2
234	331	xl93663	f	0	0	yearling	3
235	332	xk41507	f	0	0	older	2
236	333	xl94731	f	0	1	yearling	1
237	334	vd16567	f	0	0	yearling	1
238	336	xk40522	f	0	0	older	5
239	337	xl94622	f	0	0	yearling	3
240	338	vd16411	f	0	0	older	3
241	340	xl28346	f	0	0	older	3
242	342	xl95099	f	1	0	older	3
243	343	xk41477	f	0	0	older	3
244	344	xl94705	f	0	0	yearling	4
245	345	vd16415	f	1	0	older	1
246	346	xl94751	f	0	0	yearling	0
247	347	xk41695	f	0	0	older	1
248	348	xk40984	f	0	0	older	1
249	349	xl93665	f	0	0	yearling	1
250	350	xl94724	f	0	0	yearling	2
251	1	vt24100	m	0	0	yearling	4
252	2	vd16785	m	0	0	yearling	5
253	3	xk41405	m	0	0	older	0
254	4	xl28319	m	0	0	older	0
255	5	xl94928	m	0	0	yearling	5
256	6	vd16779	m	1	0	yearling	5
257	7	vd16386	m	0	1	older	4
258	8	xl94150	m	0	0	yearling	1
259	9	xl93682	m	0	0	yearling	3
260	11	xk41424	m	0	0	older	4
261	13	vd16367	m	1	0	older	3
262	15	vd16382	m	0	1	older	0
263	16	vd16486	m	2	0	yearling	4
264	17	xl28385	m	2	0	older	1
265	19	vd16299	m	0	0	older	4
266	21	xl94712	m	0	0	yearling	4
267	23	vd16131	m	0	1	older	2
268	25	xk40650	m	0	0	older	1
269	26	xk41247	m	0	0	older	4
270	27	xl28227	m	0	0	older	3
271	28	xk41436	m	0	0	older	0
272	29	xl94403	m	0	1	yearling	2
273	30	xl94701	m	1	0	yearling	5
274	31	xl95845	m	0	0	yearling	3
275	32	xk41192	m	0	0	older	9
276	33	xk41950	m	3	1	older	7
277	34	vd16283	m	1	1	older	4
278	35	xl28958	m	2	0	older	3
279	37	vd16254	m	0	0	older	2
280	39	vt26735	m	0	0	older	6
281	41	vd16776	m	0	0	yearling	1
282	42	vd16683	m	0	1	yearling	4
283	43	vd16775	m	0	0	yearling	3
284	44	vd16778	m	0	0	yearling	3
285	45	vd16242	m	0	0	older	1
286	47	xk41751	m	2	0	older	1
287	48	vd16340	m	0	2	older	3
288	49	vd16108	m	0	0	older	1
289	50	xl94471	m	0	0	yearling	1
290	51	xl93891	m	0	0	yearling	4
291	52	xk40731	m	0	0	older	6
292	53	xl93864	m	0	0	yearling	4
293	55	xl94048	m	0	0	yearling	2
294	57	xl94703	m	0	0	yearling	1
295	58	xl93524	m	0	0	yearling	1
296	59	xt96091	m	0	1	older	4
297	60	xl28160	m	6	0	older	0
298	61	vd16780	m	2	0	yearling	1
299	62	xl28902	m	0	0	older	3
300	65	xk40321	m	0	0	older	4
301	66	xk40077	m	0	0	older	4
302	67	vd16290	m	0	0	older	0
303	68	vd16589	m	0	0	older	4
304	69	vd16817	m	0	0	yearling	0
305	70	vd16258	m	0	1	older	5
306	72	xk40471	m	1	0	older	9
307	73	vd16554	m	0	0	yearling	3
308	76	xl93654	m	0	0	yearling	3
309	77	vd16336	m	0	0	older	2
310	78	xk41432	m	1	3	older	0
311	79	xl94268	m	0	1	yearling	2
312	80	vd16259	m	0	0	older	3
313	82	vd16787	m	0	0	yearling	6
314	83	xl94014	m	0	0	yearling	2
315	84	vd16390	m	0	1	older	5
316	85	xl94209	m	0	0	yearling	0
317	86	vd16392	m	0	0	older	8
318	88	xl94708	m	0	1	yearling	6
319	90	vd16884	m	0	0	yearling	1
320	91	xl28891	m	1	0	older	3
321	92	xl94859	m	0	1	yearling	2
322	93	xl93742	m	0	1	yearling	3
323	94	xl94931	m	0	1	yearling	2
324	95	vd16005	m	0	1	older	1
325	97	xk41411	m	0	0	older	2
326	98	xk41654	m	1	0	older	5
327	99	vd16368	m	0	0	older	4
328	100	vt24153	m	1	0	yearling	9
329	101	xk41408	m	0	1	older	4
330	103	xl28232	m	0	0	older	2
331	104	xl94673	m	0	0	yearling	1
332	105	vd17000	m	0	0	yearling	1
333	106	xk41576	m	0	1	older	1
334	107	xl28259	m	0	0	older	2
335	108	xl94716	m	0	0	yearling	3
336	109	vt24156	m	0	0	yearling	2
337	110	vt24127	m	0	0	yearling	2
338	111	vd16777	m	0	0	yearling	2
339	112	xl28537	m	0	0	older	2
340	113	xk41879	m	1	0	older	0
341	114	vd16243	m	0	0	older	4
342	115	xl93650	m	0	0	yearling	4
343	116	xl28208	m	0	0	older	1
344	117	vd16816	m	0	0	yearling	5
345	118	xl94704	m	0	0	yearling	2
346	119	xl28188	m	0	2	older	3
347	120	xk41404	m	1	0	older	5
348	121	xk41730	m	0	0	older	1
349	122	xl28918	m	0	0	older	7
350	123	xl28539	m	0	1	older	4
351	124	xl94929	m	0	0	yearling	1
352	125	vd16517	m	2	0	older	0
353	126	xl93557	m	0	0	yearling	6
354	127	xl94110	m	0	0	yearling	1
355	128	vd16682	m	0	0	yearling	0
356	129	xk41431	m	0	0	older	3
357	130	vd16781	m	1	1	yearling	3
358	133	xl95846	m	0	2	yearling	6
359	134	xk41434	m	0	0	older	6
360	135	xk41403	m	0	1	older	4
361	136	xl95847	m	0	0	yearling	2
362	138	xl93863	m	0	2	yearling	3
363	139	vd16519	m	0	0	older	3
364	140	xk41912	m	0	0	older	3
365	141	vt24154	m	0	2	yearling	3
366	142	xl94930	m	0	0	yearling	3
367	143	vd16225	m	2	0	older	5
368	144	vt26899	m	0	1	older	4
369	145	xl28691	m	0	0	older	10
370	148	xl94102	m	0	0	yearling	0
371	150	xk41421	m	0	0	older	4
372	151	vd16786	m	1	0	yearling	4
373	152	vd16540	m	0	0	older	5
374	153	xl94900	m	1	0	yearling	4
375	154	xl93622	m	0	0	yearling	8
376	156	vd16886	m	0	0	yearling	3
377	157	xl28289	m	0	0	older	4
378	158	vd16887	m	0	0	yearling	6
379	159	vd16303	m	1	0	older	1
380	160	vd16285	m	0	0	older	6
381	161	xk40289	m	2	0	older	6
382	162	vd16296	m	0	0	older	13
383	163	xl28976	m	2	1	older	3
384	164	vd16773	m	0	0	yearling	3
385	165	xl94715	m	0	2	yearling	4
386	166	xt96310	m	0	1	older	3
387	167	xk40659	m	0	1	older	3
388	168	xl94058	m	0	0	yearling	6
389	169	xk40263	m	0	0	older	2
390	171	xk40628	m	0	0	older	2
391	173	vd16273	m	2	0	older	6
392	174	vd16305	m	0	0	older	5
393	176	xk41342	m	0	0	older	2
394	177	vt24212	m	0	0	yearling	3
395	178	xk40131	m	0	0	older	3
396	179	vd16888	m	0	0	yearling	3
397	180	vd16378	m	0	0	older	4
398	181	xk41636	m	0	0	older	3
399	182	xl94004	m	0	1	yearling	2
400	183	vd16326	m	0	0	older	3
401	184	xl28611	m	0	0	older	2
402	185	xk40857	m	0	0	older	2
403	186	vd16782	m	0	0	yearling	7
404	187	xl94138	m	0	0	yearling	4
405	188	xl28916	m	0	0	older	6
406	189	xt96184	m	3	1	older	0
407	190	vd16306	m	0	0	older	3
408	191	xt96116	m	0	1	older	7
409	192	vd16774	m	0	1	yearling	2
410	193	xl94702	m	0	1	yearling	11
411	194	vd16263	m	0	0	older	4
412	195	vd16248	m	0	1	older	4
413	196	vd16329	m	2	0	older	5
414	197	vd16885	m	0	0	yearling	3
415	198	xk41049	m	1	0	older	2
416	199	vt26752	m	0	0	older	5
417	200	vd16370	m	1	0	older	4
418	201	xk41402	m	0	0	older	2
419	211	vd16362	m	0	0	older	0
420	214	xl94065	m	5	0	yearling	2
421	215	xl93639	m	0	0	yearling	1
422	216	vd16516	m	0	1	older	0
423	218	xl93555	m	0	0	yearling	1
424	220	vd16783	m	0	0	yearling	0
425	221	xl94537	m	0	0	yearling	0
426	224	xl93664	m	1	1	yearling	1
427	229	vt24078	m	0	0	yearling	6
428	230	vd16784	m	0	0	yearling	0
429	231	xl28198	m	3	0	older	0
430	235	vd16882	m	0	0	yearling	1
431	238	vd16229	m	0	0	older	0
432	239	vt26788	m	1	1	older	2
433	241	vd16999	m	0	0	yearling	0
434	242	vd16152	m	0	0	older	0
435	251	vd16267	m	0	0	older	0
436	257	xl94713	m	1	0	yearling	0
437	267	xl94142	m	0	0	yearling	2
438	269	xl93795	m	0	1	yearling	0
439	272	xl94228	m	0	0	yearling	1
440	279	vd16883	m	0	0	yearling	0
441	281	xl28721	m	0	0	older	0
442	301	xk41808	m	0	6	older	1
443	302	vt24194	m	0	0	yearling	5
444	303	xl93579	m	0	0	older	2
445	304	xl93592	m	0	0	older	2
446	305	xl95179	m	0	0	yearling	6
447	306	vd16397	m	0	1	older	3
448	307	xl28470	m	0	0	older	6
449	311	xk41965	m	0	0	older	5
450	312	xl93672	m	0	0	yearling	0
451	313	xl95112	m	0	1	yearling	3
452	314	xl95150	m	0	0	yearling	7
453	316	xl28359	m	0	1	older	0
454	318	xl28644	m	0	1	older	6
455	319	xk40271	m	0	0	older	3
456	320	xk40567	m	0	0	older	3
457	321	xk41823	m	0	0	older	3
458	322	vd16387	m	0	0	older	0
459	323	vd16543	m	1	0	older	1
460	324	xl95076	m	0	0	yearling	3
461	325	xl95037	m	0	0	yearling	4
462	326	xl95271	m	0	0	yearling	1
463	327	xl95263	m	1	0	yearling	5
464	328	vd16380	m	0	1	older	1
465	330	xk40262	m	0	0	older	2
466	331	xl93517	m	0	1	yearling	3
467	333	xk40381	m	0	0	older	1
468	334	xl95272	m	0	1	yearling	1
469	336	xk40032	m	2	0	older	5
470	337	xl93818	m	0	1	older	3
471	338	vd16029	m	0	0	older	3
472	340	xl93757	m	0	0	older	3
473	342	xk40294	m	0	0	older	3
474	343	xl93545	m	0	0	older	3
475	344	xl93572	m	0	0	older	4
476	345	xt96008	m	0	0	older	1
477	346	vd16633	m	0	0	older	0
478	347	xl95208	m	0	3	yearling	1
479	348	xl94586	m	0	1	yearling	1
480	350	xl93748	m	1	0	older	2

## Sheet: Pedigree
No	id	dam	sire
5	vt26505	#N/A	#N/A
15	vt26513	#N/A	#N/A
47	vt26545	#N/A	#N/A
50	vt26548	#N/A	#N/A
57	vt26555	#N/A	#N/A
62	vt26560	#N/A	#N/A
67	vt26565	#N/A	#N/A
85	vt26583	#N/A	#N/A
87	vt26585	#N/A	#N/A
94	vt26592	#N/A	#N/A
106	vt26605	#N/A	#N/A
108	vt26607	#N/A	#N/A
125	vt26624	#N/A	#N/A
154	vt26653	#N/A	#N/A
184	vt26804	#N/A	#N/A
191	vt26730	#N/A	#N/A
192	vt26731	#N/A	#N/A
194	vt26752	#N/A	#N/A
198	vt26788	#N/A	#N/A
206	vt26884	#N/A	#N/A
211	vt26889	#N/A	#N/A
224	xt96012	#N/A	#N/A
237	xt96184	#N/A	#N/A
238	xt96185	#N/A	#N/A
264	xt96533	#N/A	#N/A
271	xk40003	#N/A	#N/A
295	xk40032	#N/A	#N/A
299	xk40036	#N/A	#N/A
336	xk40074	#N/A	#N/A
339	xk40077	#N/A	#N/A
361	xt96669	#N/A	#N/A
364	xt96672	#N/A	#N/A
369	xt96677	#N/A	#N/A
373	xt96681	#N/A	#N/A
378	xt96685	#N/A	#N/A
379	xt96686	#N/A	#N/A
387	xt96539	#N/A	#N/A
392	xt96694	#N/A	#N/A
400	xt96542	#N/A	#N/A
404	xt96546	#N/A	#N/A
405	xt96547	#N/A	#N/A
408	xt96550	#N/A	#N/A
413	xt96555	#N/A	#N/A
426	xt96568	#N/A	#N/A
427	xt96569	#N/A	#N/A
445	xt96587	#N/A	#N/A
447	xt96589	#N/A	#N/A
451	xt96593	#N/A	#N/A
456	xt96598	#N/A	#N/A
468	xk40110	#N/A	#N/A
476	xk40255	#N/A	#N/A
486	xk40486	#N/A	#N/A
488	xk40628	#N/A	#N/A
497	xk40806	#N/A	#N/A
501	xk40857	#N/A	#N/A
503	xk41049	#N/A	#N/A
516	xk41318	#N/A	#N/A
521	xk41342	#N/A	#N/A
529	xk41402	#N/A	#N/A
530	xk41403	#N/A	#N/A
531	xk41404	#N/A	#N/A
532	xk41405	#N/A	#N/A
535	xk41408	#N/A	#N/A
538	xk41411	#N/A	#N/A
548	xk41421	#N/A	#N/A
551	xk41424	#N/A	#N/A
557	xk41430	#N/A	#N/A
558	xk41431	#N/A	#N/A
559	xk41432	#N/A	#N/A
561	xk41434	#N/A	#N/A
563	xk41436	#N/A	#N/A
570	xk41443	#N/A	#N/A
572	xk41445	#N/A	#N/A
575	xk41448	#N/A	#N/A
579	xk41452	#N/A	#N/A
580	xk41453	#N/A	#N/A
589	xk41462	#N/A	#N/A
599	xk41472	#N/A	#N/A
600	xk41473	#N/A	#N/A
603	xk41476	#N/A	#N/A
604	xk41477	#N/A	#N/A
607	xk41480	#N/A	#N/A
608	xk41481	#N/A	#N/A
632	xk41505	#N/A	#N/A
633	xk41506	#N/A	#N/A
634	xk41507	#N/A	#N/A
641	xk41514	#N/A	#N/A
642	xk41515	#N/A	#N/A
643	xk41516	#N/A	#N/A
646	xk41519	#N/A	#N/A
649	xk41522	#N/A	#N/A
651	xk41524	#N/A	#N/A
653	xk41526	#N/A	#N/A
654	xk41527	#N/A	#N/A
671	xk41600	#N/A	#N/A
675	xk41695	#N/A	#N/A
680	vd16005	#N/A	#N/A
683	vd16008	#N/A	#N/A
687	xk41699	#N/A	#N/A
688	xk41965	#N/A	#N/A
692	xl28160	#N/A	#N/A
693	xl28167	#N/A	#N/A
696	xk41808	#N/A	#N/A
698	xk41823	#N/A	#N/A
712	vd16131	#N/A	#N/A
715	xl28470	#N/A	#N/A
719	xl28565	#N/A	#N/A
723	xl28359	#N/A	#N/A
728	xl28644	#N/A	#N/A
735	xl28721	#N/A	#N/A
739	xl28767	#N/A	#N/A
740	xl28691	#N/A	#N/A
742	xl28589	#N/A	#N/A
747	xl28915	#N/A	#N/A
748	xl28927	#N/A	#N/A
752	xl28976	#N/A	#N/A
755	vd16225	#N/A	#N/A
757	vd16378	#N/A	#N/A
759	vd16242	#N/A	#N/A
760	vd16243	#N/A	#N/A
765	vd16248	#N/A	#N/A
771	vd16254	#N/A	#N/A
775	vd16258	#N/A	#N/A
776	vd16259	#N/A	#N/A
780	vd16263	#N/A	#N/A
784	vd16267	#N/A	#N/A
790	vd16273	#N/A	#N/A
800	vd16283	#N/A	#N/A
802	vd16285	#N/A	#N/A
807	vd16290	#N/A	#N/A
813	vd16296	#N/A	#N/A
816	vd16299	#N/A	#N/A
820	vd16303	#N/A	#N/A
821	vd16305	#N/A	#N/A
822	vd16306	#N/A	#N/A
840	vd16326	#N/A	#N/A
843	vd16329	#N/A	#N/A
850	vd16336	#N/A	#N/A
853	vd16340	#N/A	#N/A
873	vd16362	#N/A	#N/A
877	vd16367	#N/A	#N/A
878	vd16368	#N/A	#N/A
880	vd16370	#N/A	#N/A
888	vd16380	#N/A	#N/A
890	vd16382	#N/A	#N/A
894	vd16386	#N/A	#N/A
896	vd16387	#N/A	#N/A
899	vd16390	#N/A	#N/A
901	vd16392	#N/A	#N/A
906	vd16397	#N/A	#N/A
917	vd16408	#N/A	#N/A
920	vd16411	#N/A	#N/A
923	vd16414	#N/A	#N/A
924	vd16415	#N/A	#N/A
929	vd16343	#N/A	#N/A
930	vd16377	#N/A	#N/A
936	vd16304	#N/A	#N/A
938	vd16426	#N/A	#N/A
939	vd16427	#N/A	#N/A
941	vd16429	#N/A	#N/A
942	vd16430	#N/A	#N/A
943	vd16431	#N/A	#N/A
945	vd16338	#N/A	#N/A
946	vd16363	#N/A	#N/A
949	vd16435	#N/A	#N/A
954	vd16357	#N/A	#N/A
956	vd16440	#N/A	#N/A
957	vd16441	#N/A	#N/A
958	vd16442	#N/A	#N/A
969	vd16452	#N/A	#N/A
973	vd16456	#N/A	#N/A
981	vd16464	#N/A	#N/A
990	vd16473	#N/A	#N/A
992	vd16475	#N/A	#N/A
998	vd16496	#N/A	#N/A
1001	xl93545	#N/A	#N/A
1002	xl93572	#N/A	#N/A
1004	xl93579	#N/A	#N/A
1007	vd16500	#N/A	#N/A
1009	vd16502	#N/A	#N/A
1011	vd16504	#N/A	#N/A
1012	vd16505	#N/A	#N/A
1020	vd16513	#N/A	#N/A
1023	vd16516	#N/A	#N/A
1024	xl93592	#N/A	#N/A
1026	xl93747	#N/A	#N/A
1027	xl93748	#N/A	#N/A
1028	xl93757	#N/A	#N/A
1032	vd16517	#N/A	#N/A
1034	vd16519	#N/A	#N/A
1038	xl93818	#N/A	#N/A
1041	vd16524	#N/A	#N/A
1042	vd16525	#N/A	#N/A
1044	vd16526	#N/A	#N/A
1046	vd16528	#N/A	#N/A
1054	vd16534	#N/A	#N/A
1060	vd16540	#N/A	#N/A
1063	vd16543	#N/A	#N/A
1068	vd16589	#N/A	#N/A
1069	vd16632	#N/A	#N/A
1071	vd16633	#N/A	#N/A
1075	xl94701	#N/A	#N/A
1076	xl94702	#N/A	#N/A
1077	xl94703	#N/A	#N/A
1078	xl94704	#N/A	#N/A
1079	xl94705	#N/A	#N/A
1080	xl94706	#N/A	#N/A
1082	xl94708	#N/A	#N/A
1086	xl94712	#N/A	#N/A
1087	xl94713	#N/A	#N/A
1089	xl94715	#N/A	#N/A
1090	xl94716	#N/A	#N/A
1092	xl94718	#N/A	#N/A
1093	xl94719	#N/A	#N/A
1094	xl94720	#N/A	#N/A
1095	xl94721	#N/A	#N/A
1098	xl94724	#N/A	#N/A
1099	xl94725	#N/A	#N/A
1100	xl94726	#N/A	#N/A
1101	xl94727	#N/A	#N/A
1102	xl94728	#N/A	#N/A
1103	xl94729	#N/A	#N/A
1105	xl94731	#N/A	#N/A
1106	xl94732	#N/A	#N/A
1107	xl94733	#N/A	#N/A
1108	xl94734	#N/A	#N/A
1109	xl94735	#N/A	#N/A
1110	xl94736	#N/A	#N/A
1112	xl94738	#N/A	#N/A
1113	xl94739	#N/A	#N/A
1114	xl94740	#N/A	#N/A
1115	xl94741	#N/A	#N/A
1116	xl94742	#N/A	#N/A
1117	xl94743	#N/A	#N/A
1118	xl94744	#N/A	#N/A
1119	xl94745	#N/A	#N/A
1120	xl94746	#N/A	#N/A
1121	xl94747	#N/A	#N/A
1124	xl94750	#N/A	#N/A
1125	xl94751	#N/A	#N/A
1126	xl94752	#N/A	#N/A
1127	xl94760	#N/A	#N/A
1128	xl94761	#N/A	#N/A
1129	xl94762	#N/A	#N/A
1130	xl94763	#N/A	#N/A
1131	xl94764	#N/A	#N/A
1132	xl94765	#N/A	#N/A
1133	xl94766	#N/A	#N/A
1134	xl94767	#N/A	#N/A
1135	xl94768	#N/A	#N/A
1136	xl94769	#N/A	#N/A
1141	xl94774	#N/A	#N/A
1142	xl94775	#N/A	#N/A
1143	xl94776	#N/A	#N/A
1144	xl94777	#N/A	#N/A
1148	xl94781	#N/A	#N/A
1149	xl94782	#N/A	#N/A
1150	xl94783	#N/A	#N/A
1151	xl94784	#N/A	#N/A
1152	xl94785	#N/A	#N/A
1154	xl94787	#N/A	#N/A
1155	xl94788	#N/A	#N/A
1156	xl94789	#N/A	#N/A
1157	xl94790	#N/A	#N/A
1158	xl94791	#N/A	#N/A
1164	xl94796	#N/A	#N/A
1165	xl94797	#N/A	#N/A
1166	xl94798	#N/A	#N/A
1167	xl94799	#N/A	#N/A
1169	xl94602	#N/A	#N/A
1170	xl94603	#N/A	#N/A
1171	xl94604	#N/A	#N/A
1172	xl94605	#N/A	#N/A
1173	xl94606	#N/A	#N/A
1174	xl94607	#N/A	#N/A
1175	xl94608	#N/A	#N/A
1176	xl94615	#N/A	#N/A
1177	xl94616	#N/A	#N/A
1178	xl94617	#N/A	#N/A
1179	xl94618	#N/A	#N/A
1180	xl94619	#N/A	#N/A
1181	xl94620	#N/A	#N/A
1182	xl94621	#N/A	#N/A
1183	xl94622	#N/A	#N/A
1184	xl94623	#N/A	#N/A
1185	xl94624	#N/A	#N/A
1186	xl94625	#N/A	#N/A
1187	xl94626	#N/A	#N/A
1188	xl94634	#N/A	#N/A
1189	xl94635	#N/A	#N/A
1190	xl94660	#N/A	#N/A
1191	xl94661	#N/A	#N/A
1192	xl94670	#N/A	#N/A
1193	xl94671	#N/A	#N/A
1194	xl94672	#N/A	#N/A
1195	xl94673	#N/A	#N/A
1196	xl95037	#N/A	#N/A
1197	xl94815	#N/A	#N/A
1198	xl94837	#N/A	#N/A
1199	xl94838	#N/A	#N/A
1200	xl95076	#N/A	#N/A
1201	xl94859	#N/A	#N/A
1202	xl94900	#N/A	#N/A
1203	xl94921	#N/A	#N/A
1204	xl95112	#N/A	#N/A
1207	xl94928	#N/A	#N/A
1208	xl94929	#N/A	#N/A
1209	xl94930	#N/A	#N/A
1210	xl94931	#N/A	#N/A
1211	xl95150	#N/A	#N/A
1212	xl95179	#N/A	#N/A
1213	xl95208	#N/A	#N/A
1214	xl95263	#N/A	#N/A
1215	xl95271	#N/A	#N/A
1216	xl95272	#N/A	#N/A
1218	xl95845	#N/A	#N/A
1219	xl95846	#N/A	#N/A
1220	xl95847	#N/A	#N/A
1221	vd16682	#N/A	#N/A
1222	vd16683	#N/A	#N/A
1225	vd16773	#N/A	#N/A
1226	vd16774	#N/A	#N/A
1227	vd16775	#N/A	#N/A
1228	vd16776	#N/A	#N/A
1229	vd16777	#N/A	#N/A
1230	vd16778	#N/A	#N/A
1231	vd16779	#N/A	#N/A
1232	vd16780	#N/A	#N/A
1233	vd16781	#N/A	#N/A
1235	vd16782	#N/A	#N/A
1236	vd16783	#N/A	#N/A
1237	vd16784	#N/A	#N/A
1238	vd16785	#N/A	#N/A
1239	vd16786	#N/A	#N/A
1240	vd16787	#N/A	#N/A
1241	vd16816	#N/A	#N/A
1242	vd16817	#N/A	#N/A
1244	vd16882	#N/A	#N/A
1245	vd16883	#N/A	#N/A
1246	vd16884	#N/A	#N/A
1247	vd16885	#N/A	#N/A
1248	vd16886	#N/A	#N/A
1249	vd16887	#N/A	#N/A
1250	vd16888	#N/A	#N/A
1252	vd16999	#N/A	#N/A
1253	vd17000	#N/A	#N/A
1254	vt24078	#N/A	#N/A
1255	vt24100	#N/A	#N/A
1256	vt24127	#N/A	#N/A
1257	vt24143	#N/A	#N/A
1260	vt24152	#N/A	#N/A
1261	vt24153	#N/A	#N/A
1262	vt24154	#N/A	#N/A
1263	vt24155	#N/A	#N/A
1264	vt24156	#N/A	#N/A
1265	vt24170	#N/A	#N/A
1266	xl95099	#N/A	#N/A
1267	vt24185	#N/A	#N/A
1268	vt24194	#N/A	#N/A
1269	vt24195	#N/A	#N/A
1270	vt24201	#N/A	#N/A
1271	vt24206	#N/A	#N/A
1272	vt24212	#N/A	#N/A
1944	vt26924	#N/A	vt26889
1947	vt26739	vt26560	vt26730
1950	vt26981	#N/A	#N/A
1957	xt96625	#N/A	#N/A
1964	vt26950	#N/A	vt26884
1968	vt26744	vt26560	vt26730
1969	xt96045	#N/A	#N/A
1971	xt96054	vt26605	#N/A
1972	xt96219	#N/A	xt96184
1976	xt96131	vt26624	vt26545
1982	xt96290	vt26653	#N/A
1983	vt26735	vt26565	vt26731
1990	xt96310	#N/A	vt26548
1994	xt96091	#N/A	#N/A
1995	xk40289	#N/A	#N/A
1997	vt26954	vt26592	#N/A
1999	xk40131	xt96685	#N/A
2001	xk40302	xt96677	xk40255
2003	xk40731	xt96550	vt26505
2006	xk40314	vt26605	#N/A
2010	xk40321	vt26555	xt96184
2014	vt26808	#N/A	#N/A
2018	vt26715	#N/A	#N/A
2021	xk40522	#N/A	#N/A
2024	xt96035	#N/A	#N/A
2025	xt96074	#N/A	vt26513
2026	xt96105	#N/A	xt96012
2030	xk40863	#N/A	xk40857
2032	xt96134	vt26624	vt26545
2034	xk40599	xt96539	xk40486
2035	xk40855	#N/A	#N/A
2036	xk40984	xt96569	#N/A
2040	xk40139	#N/A	vt26731
2043	xk41296	xk40110	#N/A
2045	vt26899	#N/A	#N/A
2047	xk40471	#N/A	vt26884
2050	xk40900	#N/A	xk40036
2054	xk40682	xt96555	#N/A
2057	vt26737	vt26565	vt26731
2059	xk41255	vt26804	#N/A
2060	xt96008	vt26607	#N/A
2062	xk40739	xt96547	xk40074
2066	xk40567	#N/A	#N/A
2067	xk40734	xt96550	vt26505
2072	xk40262	vt26585	vt26548
2075	xk40294	#N/A	#N/A
2076	xk41192	#N/A	#N/A
2083	xt96116	#N/A	#N/A
2084	xl28259	#N/A	#N/A
2085	vd16029	vt26804	xk41049
2086	xl28289	#N/A	#N/A
2089	xk40263	vt26585	vt26548
2090	xk40307	#N/A	vt26513
2091	xk40738	xt96547	xk40074
2110	xl28385	xk41516	xk41430
2115	xk41730	#N/A	xt96533
2118	xl28172	xk41480	xl28167
2122	xl28902	#N/A	xt96184
2123	xl28918	xk41699	xl28915
2128	xl28232	#N/A	#N/A
2132	vd16152	xk41481	vd16131
2133	xk41950	xt96672	#N/A
2136	xk41751	#N/A	xt96185
2139	vt26703	#N/A	#N/A
2140	xk40300	xt96677	xk40255
2146	xl28393	#N/A	xk41431
2148	xl28917	xk41699	xl28915
2149	vd16151	xk41481	vd16131
2151	xl28102	#N/A	xk40036
2152	xl28324	xt96598	xk40003
2153	xl28852	#N/A	#N/A
2154	xl28390	xk41516	xk41430
2155	vd16070	vt26583	xt96012
2160	vd16126	xt96681	#N/A
2163	vd16185	#N/A	xk41434
2164	xk40437	vt26607	#N/A
2166	vd16098	xt96685	vt26752
2170	xk41576	xt96686	#N/A
2171	xl28471	#N/A	xl28470
2173	xl28319	xt96598	xk40003
2176	xk40235	#N/A	vt26889
2178	vd16103	#N/A	xk41403
2180	xl93524	#N/A	#N/A
2182	xk41644	#N/A	xk41404
2184	xl94142	xt96686	xt96669
2186	xl93942	xk41506	xk41431
2188	xk41725	#N/A	vt26505
2189	xk41900	#N/A	#N/A
2190	xk41529	#N/A	#N/A
2191	xk40600	xt96539	xk40486
2194	xl28709	#N/A	#N/A
2196	xl93719	vd16415	xl28470
2197	xl94214	vt26555	xl28691
2198	xk41068	xt96598	#N/A
2199	xk41864	#N/A	xk41342
2200	xl28772	#N/A	xl28767
2202	xl93752	#N/A	xk40032
2203	xl93813	#N/A	#N/A
2205	xl28497	#N/A	#N/A
2206	xl94155	vd16426	xk41342
2207	xl94213	vt26555	xl28691
2208	xl94284	#N/A	vd16362
2209	xl28173	xk41480	xl28167
2210	xl93631	xk41473	#N/A
2211	xl93615	vt26653	xk41049
2212	xl94384	vd16456	xk40857
2213	xl94023	xk41505	xk40806
2214	xl94028	xk41505	xk40806
2215	xl94057	#N/A	#N/A
2216	xk41636	#N/A	#N/A
2217	xk40381	#N/A	xt96533
2218	xl94450	#N/A	#N/A
2219	xl93517	#N/A	#N/A
2220	xk40659	#N/A	xk40628
2221	xl93557	vd16408	xk41965
2222	xl94268	xk41515	xl28644
2223	xl93863	xt96546	xl28565
2224	xl94586	vd16496	#N/A
2225	xl28916	xk41699	xl28915
2226	xl93555	vd16408	xk41965
2228	xl93672	vd16377	vd16368
2229	vd16554	#N/A	#N/A
2230	xl94138	xt96686	xt96669
2231	xl94537	#N/A	#N/A
2232	xl93795	#N/A	#N/A
2233	xl93864	xt96546	xl28565
2234	xl94004	xt96568	xk41404
2235	xl94209	vt26555	xl28691
2236	xl94228	#N/A	#N/A
2237	vd16229	vt26624	#N/A
2238	xl93554	vd16408	xk41965
2239	xl94511	#N/A	vd16382
2456	xk41247	#N/A	xt96310
2458	xk41235	#N/A	vt26739
2459	xk40757	#N/A	#N/A
2462	xk40671	xt96219	xt96625
2464	xk40271	#N/A	vt26924
2465	xk40650	xt96054	#N/A
2468	xk40675	xt96219	xt96625
2473	xk41646	vt26744	#N/A
2487	xk41654	#N/A	#N/A
2489	xl28227	vt26592	#N/A
2490	xl28539	xt96045	xk41436
2493	xk41879	#N/A	#N/A
2495	xl28198	xt96569	#N/A
2496	xl28208	#N/A	xk40321
2509	xk41759	xt96542	vt26981
2512	xl28189	#N/A	xk40302
2516	xl28815	xt96131	xk40806
2519	xl28249	#N/A	#N/A
2524	xl28463	xk41507	xt96134
2525	xl28346	xk40855	#N/A
2526	xk41677	xk41445	#N/A
2527	xl28891	xk40682	#N/A
2528	xl28656	xk40734	xk40567
2530	xk41855	#N/A	vt26924
2532	xk41990	xt96219	xk40074
2533	xl28958	#N/A	xk40294
2535	xl93654	vt26737	vd16008
2536	xl94014	xk40599	xk40289
2537	xl93639	xk41472	xt96310
2538	xl93684	xk41445	xk40738
2539	xl94520	vd16070	#N/A
2541	xl94470	xt96593	xk40307
2542	xk41681	vt26808	#N/A
2543	xl28072	xk40110	vt26950
2544	xk41757	xt96542	vt26981
2545	xl28294	xt96694	xk40314
2546	xl94294	xl28390	xk40302
2547	xl93582	vt26703	xl93579
2548	xl93663	xk41296	#N/A
2550	vd16041	xk41472	vt26954
2551	vd16567	#N/A	#N/A
2552	xl28503	xt96054	#N/A
2553	xk41711	#N/A	#N/A
2554	xl93858	xl28917	#N/A
2555	vd16061	xt96290	xt96310
2556	xl93734	xl28589	xk41255
2557	xl93652	vt26737	vd16008
2558	xl93742	xk40300	#N/A
2559	xl94082	xk40139	vd16502
2560	xl93650	xt96542	xk40437
2561	xl94080	xk40139	vd16502
2562	xl28537	xt96045	xk41436
2564	xl94471	xt96593	xk40307
2565	xl93613	#N/A	xk40294
2566	xl94403	xk41481	xl28172
2567	xk41912	#N/A	vt26899
2568	vd16108	xk40863	#N/A
2570	xl94048	xt96555	#N/A
2571	xl94058	vt26583	#N/A
2572	xl93682	xt96074	xt96185
2573	vd16486	vt26808	#N/A
2574	xl28611	xk40139	xk40739
2575	xl94110	xk40863	vd16513
2576	xl93805	xt96105	xl28767
2577	xl94102	xk40863	vd16513
2578	xl28650	#N/A	#N/A
2579	xl28631	#N/A	#N/A
2702	xl28188	xk41235	#N/A
2704	xl28608	xk40757	#N/A
2707	xl28330	xt96074	#N/A
2709	xl28897	xl28589	xk40675
2712	xl93664	xt96035	xk41247
2713	xl28967	xk40671	#N/A
2715	vd16600	xl28656	xk41990
2716	xl93665	xt96035	xk41247
2717	xl94263	xl28815	vd16305
2718	xl94064	xk41759	vd16098
2720	xl93891	vd16338	xk41646
2721	xl94150	xt96131	xk41677
2722	xl94065	xk41759	vd16098
2824	xl94393	vd16505	xl28608
2825	xl93622	xl28330	#N/A
